# Supplementary material for: Nutritional prehabilitation in head and neck cancer: A systematic review
Source: Research Square preprint supplement (doi:10.21203/rs.3.rs-1471154/v1), 2022-05-17

**Appendix 1**

**Database Search History**

Ovid MEDLINE(R) <1946 to May 07, 2021>

1 "Head and Neck Cancer".mp. or "Head and Neck Neoplasms"/ 61891

2 Oropharyngeal Neoplasms/ or oropharyngeal.mp. or "Head and Neck Neoplasms"/ 72468

3 "Head and Neck Neoplasms"/ or HNC.mp. 57145

4 "Head and Neck Neoplasms"/ or Mouth Neoplasms/ or Laryngeal Neoplasms/ or throat cancer.mp. 115621

5 oral cancer.mp. or Mouth Neoplasms/ 38462

6 1 or 2 or 3 or 4 or 5 134665

7 Preoperative Care/ or Prehab.mp. 63410

8 prehabilitation.mp. or Preoperative Exercise/ 555

9 Multi-modal prehabilitation.mp. 2

10 Preoperative Care/ or preoperative.mp. 266025

11 pretreatment.mp. 163668

12 7 or 8 or 9 or 10 or 11 427778

13 Nutrition Therapy/ or Enteral Nutrition/ or Nutrition.mp. 215549

14 Dietary.mp. or Dietary Supplements/ 369952

15 Nutritional counsel?ing.mp. 935

16 dietary counsel?ing.mp. 1313

17 diet therapy.mp. or Diet Therapy/ 63904

18 13 or 14 or 15 or 16 or 17 569458

19 6 and 12 and 18 156

Embase <1974 to 2021 May 07>

1 "head and neck cancer".mp. or "head and neck cancer"/ 63008

2 oropharyngeal cancer.mp. or oropharynx cancer/ 9316

3 "head and neck cancer"/ or HNC.mp. 48916

4 throat cancer.mp. or pharynx cancer/ 4793

5 oral cancer.mp. or mouth cancer/ 27525

6 1 or 2 or 3 or 4 or 5 94813

7 prehab.mp. 102

8 prehabilitation.mp. or preoperative care/ 42352

9 multi-modal prehabilitation.mp. 8

10 preoperative treatment/ or preoperative care/ or preoperative.mp. 478494

11 pretreatment.mp. 218538

12 7 or 8 or 9 or 10 or 11 694355

13 nutrition/ or nutrition supplement/ or Nutrition.mp. or personalized nutrition/ 338921

14 dietary.mp. or dietary supplement/ 391413

15 Nutritional counsel?ing.mp. or nutrition/ or nutritional counseling/ 114423

16 diet therapy/ or dietary counsel?ing.mp. or nutritional counseling/ 60388

17 diet therapy.mp. or diet therapy/ 57143

18 13 or 14 or 15 or 16 or 17 695841

19 6 and 12 and 18 176


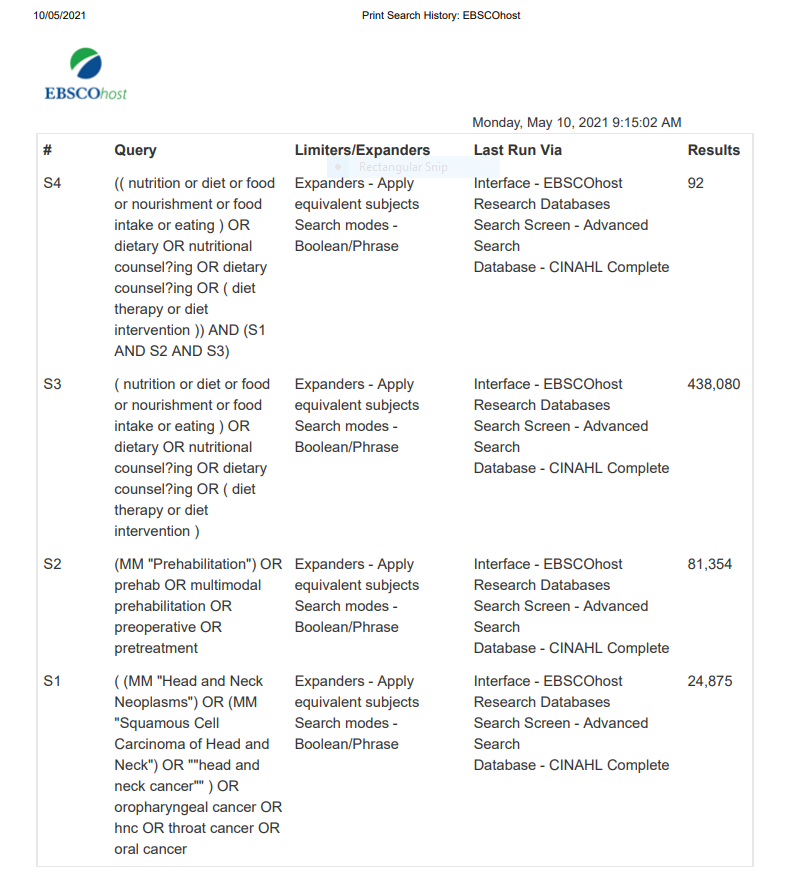

Supplement: Supplementary file 1 [file 209a84d54333f786c00a6e9a.docx]
